# Supplementary material
Source: Elsevier journal article supplement (https://www.sciencedirect.com/science/article/pii/S0212656715002656)
Supplement: mmc1 [file S0212656715002656:mmc1.doc]

**Anexo**

Cuestionario de evaluación pre y post-intervención del proyecto piloto colaborativo

| 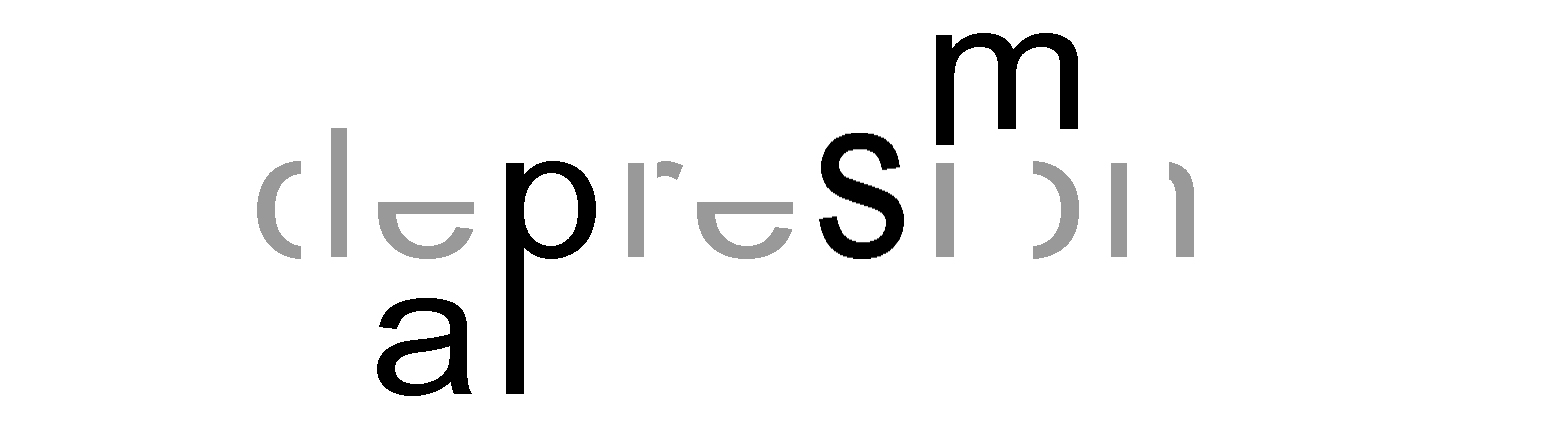**Cuestionario diseñado para evaluar la colaboración de AP y SM en la atención a las personas con depresión (A)** | | | | | | | | | |
| --- | --- | --- | --- | --- | --- | --- | --- | --- | --- |
| Sexo: | H  M | Edad: | **Situación Laboral**  Fijo  Interino  Eventual |  | **Nº años en AP/SM**:  < 1 año  1-5 años  5-10 años  10-15 años  15-30 años  >30 años |  | **Profesión:**  Medicina AP  Enfermería AP  Psiquiatría  Enfermería SM  Psicología  Trabajo Social |  | **Centro de trabajo:** |

| **COMUNICACIÓN Y CONOCIMIENTO ENTRE PROFESIONALES** | | | | | | | | | | | | | | | | | | |
| --- | --- | --- | --- | --- | --- | --- | --- | --- | --- | --- | --- | --- | --- | --- | --- | --- | --- | --- |
|  | | Nada o muy poco | | | Poco | | | | | Bastante | | | | | | Mucho | | |
| ¿Conoces a los profesionales del centro de Salud  Mental/Atención Primaria con los que compartes  pacientes? | |  | | |  | | | | |  | | | | | |  | | |
| ¿Sabes cuáles son las funciones de los distintos  Profesionales de Salud Mental/Atención Primaria  Con los que compartes pacientes? | |  | | |  | | | | |  | | | | | |  | | |
| ¿Conoces los servicios que ofrece el centro de  Salud mental/Atención Primaria con el que  Compartes pacientes y la forma de acceder a ellos? | |  | | |  | | | | |  | | | | | |  | | |
| ¿Sabes si se utiliza algún protocolo de atención a  las urgencias de salud mental en el centro de Salud Mental/Atención Primaria en que trabajas? | |  | | |  | | | | |  | | | | | |  | | |
| **INFORMACIÓN Y DERIVACIONES** | | | | | | | | | | | | | | | | | | |
| ¿Estás satisfecho con la información que recibes sobre los pacientes del centro de Salud Mental/Atención Primaria en que trabajas?[[1]](#footnote-2) | |  | | | |  | | | | |  | | | |  | | | |
| ¿Utilizas el correo electrónico o el teléfono para  comunicarte con los profesionales del centro de  Salud Mental/Atención Primaria con los que  compartes pacientes? | |  | | | |  | | | | |  | | | |  | | | |
| ¿Consideras adecuado el seguimiento a pacientes con depresión compartidos que se realiza en el otro nivel asistencial? | |  | | | |  | | | | |  | | | |  | | | |
| ¿Se utiliza en tu centro un modo de consulta no  Presencial entre AP-SM a través de la vinculación  Osabide/Osabide Global? | |  | | | |  | | | | |  | | | |  | | | |
| ¿crees que las opiniones y preferencias de los pacientes tienen un papel relevante en los aspectos de tratamiento y derivación? | |  | | | |  | | | | |  | | | |  | | | |
| **CLASIFICACIONES DIAGNÓSTICAS** | | | | | | | | | | | | | | | | | | |
| ¿Tienes un criterio claro sobre los códigos diagnósticos a utilizar en los pacientes con depresión? | |  | | | | |  | | | |  | | | |  | | | |
| ¿Crees que es importante unificar los criterios diagnósticos y utilizar códigos similares? | |  | | | | |  | | | |  | | | |  | | | |
| **Utilización GPC** | | | | | | | | | | | | | | | | | | |
| ¿Utilizas Guías de Práctica Clínica (GPC) en el abordaje de pacientes con depresión? | |  | | | | |  | | | |  | | | |  | | | |
| ¿Crees que mejoraría la atención a estos pacientes la utilización de GPC compartidas entre AP/SM? | |  | | | | |  | | | |  | | | |  | | | |
| **FORMACIÓN** | | | | | | | | | | | | | | | | | | |
| ¿Con qué frecuencia se celebran reuniones AP/SM? | Inexistentes | |  | Cada 6/12  meses | | | |  | Cada 3/6 meses | | | |  | Cada 1/3 meses | | | |  |
| ¿Con qué frecuencia recibes formación continuada en depresión relacionada con el otro nivel asistencial? (En AP en psiquiatría y salud mental; en SM en comorbilidades y otros tratamientos) | No se realizan | |  | Irregulares <3 año | | | |  | Regulares > 3 año | | | |  | | | | | |
| ¿Participan todos los estamentos profesionales en las actividades formativas o reuniones entre niveles? | Solo medicina y psiquiatría | |  | Medicina, psiquiatría y otra | | | | | | |  | Todas las profesiones | | | | |  | |

| 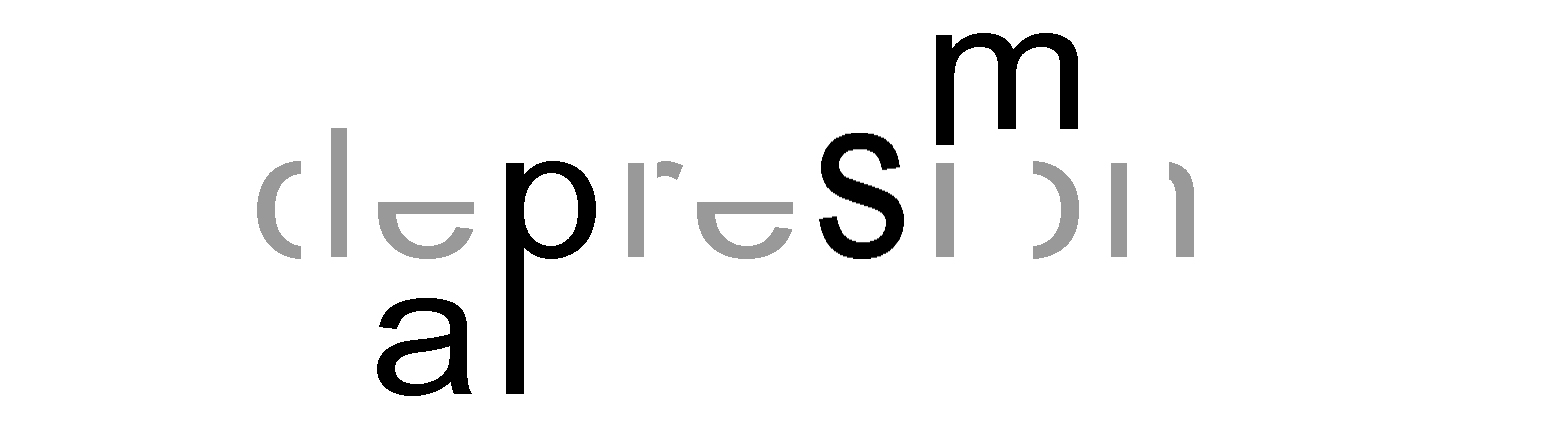 Cuestionario diseñado para evaluar la colaboración de AP y SM en el tratamiento de personas con depresión | | | | | | | |
| --- | --- | --- | --- | --- | --- | --- | --- |
|  | Nada o muy poco | | Poco | | Bastante | | Mucho |
| **INDICADORES** | | | | | | | |
| ¿Crees importante tener indicadores que evalúen la atención a los pacientes con depresión? |  | |  | |  |  | |
| ¿Se realizan en tu centro actividades de evaluación relacionadas con la depresión? |  | |  | |  |  | |
| Puntúa del 1 al 4 los siguientes  indicadores relacionados con la depresión   | **Indicador** | 1 | 2 | 3 | 4 | | --- | --- | --- | --- | --- | | Número y motivo de las derivaciones entre niveles |  |  |  |  | | Calidad de la información de las derivaciones/informes |  |  |  |  | | Tiempo de espera según prioridades |  |  |  |  | | Incidencia y prevalencia de depresión en tu centro y comarca/OSI |  |  |  |  | | Perfil prescriptor de tu centro y comarca/OSI |  |  |  |  | | Adecuación de la prescripción según criterios compartidos entre niveles |  |  |  |  | | Valorar la evolución de los pacientes con depresión |  |  |  |  |   (1 nada, 2 poco, 3 bastante, 4 mucho) | | | | | | | |
| **satisfacción** | | | | | | | |
| ¿En términos generales, ¿cómo de satisfactorias consideras tus relaciones con el otro nivel asistencial | Nada o  muy poco | Poco | | Bastante | | | Mucho |
|  |  | |  | | |  |

| 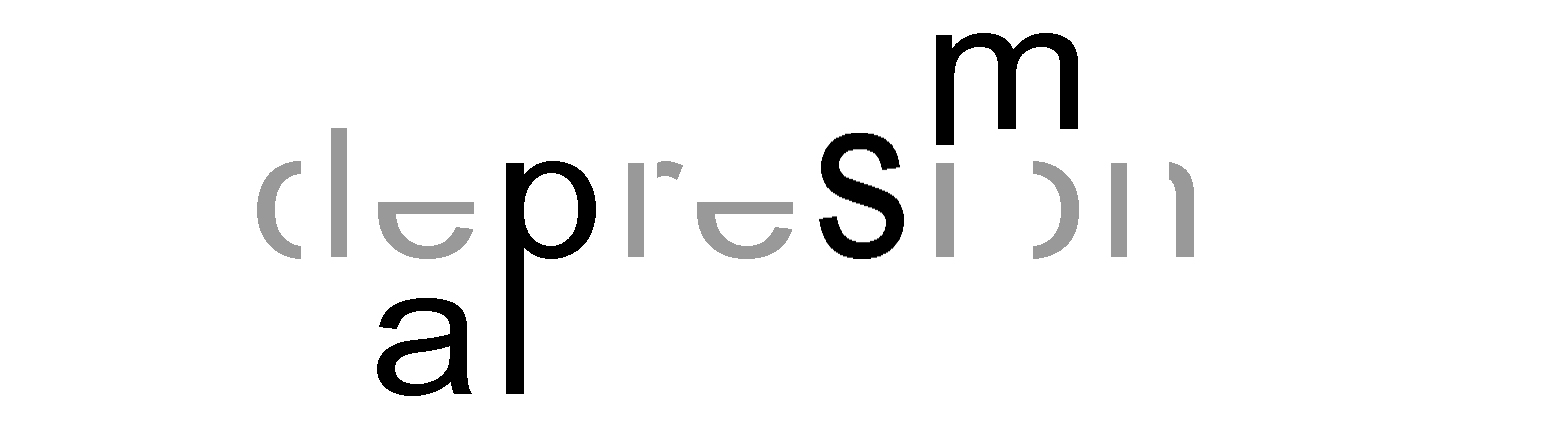 **Cuestionario diseñado para evaluar la colaboración de AP y SM en la atención a las personas con depresión (B)** | | | | | | |
| --- | --- | --- | --- | --- | --- | --- |
|  | Nada o muy poco | Poco | | Bastante | | Mucho |
| **VALORACIÓN DE LA EXPERIENCIA DE COLABORACIÓN** | | | | | | |
| ¿Te ha resultado útil contar con los listados actualizados de los profesionales de tu centro de AP/SM de referencia? |  | |  | |  |  |
| ¿Piensas que un mayor conocimiento de los profesionales de referencia ha podido contribuir a mejorar asistencia a los pacientes compartidos? |  | |  | |  |  |
| ¿Crees que ha sido de ayuda la readecuación del listado de códigos de los trastornos depresivos? |  | |  | |  |  |
| ¿Te han parecido adecuadas las Guías de Práctica Clínica seleccionadas y distribuidas? |  | |  | |  |  |
| ¿Las sesiones conjuntas AP/SM han resultado de interés? |  | |  | |  |  |
| ¿Consideras de utilidad el haber compartido los materiales y sesiones de otros centros? |  | |  | |  |  |
| ¿Piensas que la experiencia ha ayudado a mejorar el diagnóstico y tratamiento de los casos de depresión? |  | |  | |  |  |
| ¿Y en cuanto a la mejora de la derivación y el seguimiento de estos pacientes? |  | |  | |  |  |
| El seguimiento por parte del equipo investigador ¿te ha parecido apropiado? |  | |  | |  |  |
| ¿La experiencia ha supuesto una carga de trabajo añadida? |  | |  | |  |  |

| 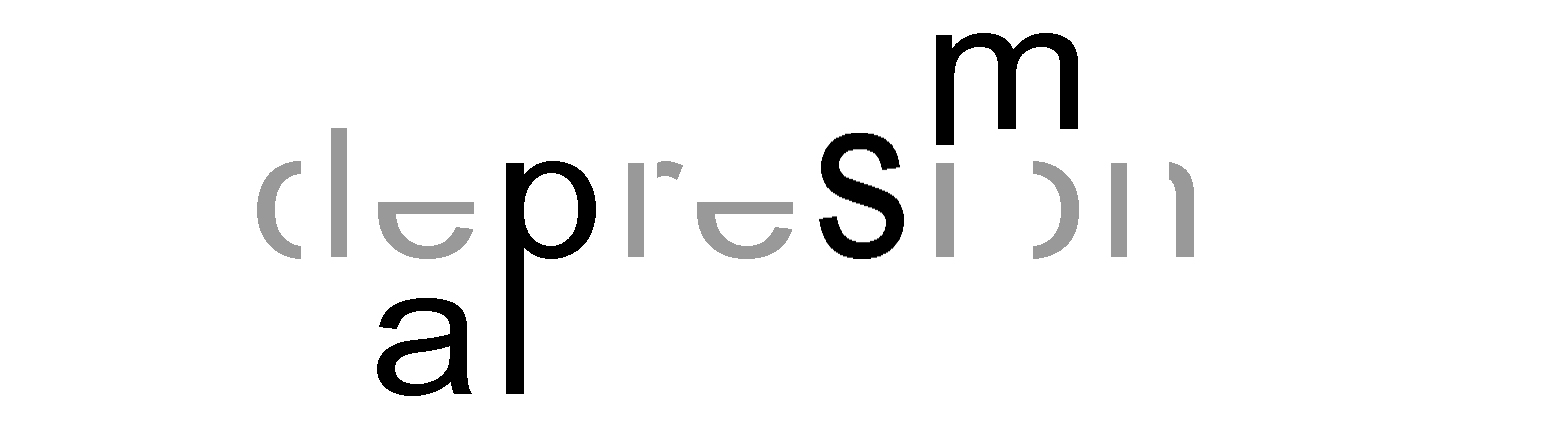 **Cuestionario diseñado para evaluar la colaboración de AP y SM en la atención a las de personas con depresión (C)** | | | | | | | | | |
| --- | --- | --- | --- | --- | --- | --- | --- | --- | --- |
|  | Nada o muy poco | Poco | | Bastante | | | | | Mucho |
| **PERSPECTIVAS DE FUTURO** | | | | | | | | | |
| **a) ¿Considerarías justificado continuar trabajando en la colaboración AP/SM?** |  | |  | | |  | |  | |
| **¿Cuáles serían las razones principales?** | | | | | | | | | |
| **b) ¿Te parecería adecuado continuar con las cuatro áreas o líneas de trabajo seguidas durante esta experiencia piloto?** | | | | | | | | | |
| I ) Mejorar la comunicación y el conocimiento entre los profesionales |  | |  | | |  | |  | |
| II ) Diagnóstico/codificación, derivación y seguimiento de los pacientes con depresión |  | |  | | |  | |  | |
| III ) Formación compartida |  | |  | | |  | |  | |
| IV ) Evaluación |  | |  | | |  | |  | |
| **¿Incorporarías, quitarías o modificarías alguna?** | | | | | | | | | |
| **c) En cada una de las áreas o líneas de trabajo hemos llevado a cabo distintas intervenciones. ¿Crees importante que se mantengan?** | | | | | | | | | |
| I Listados de profesionales actualizados |  | |  | |  | |  | | |
| II Readecuación de códigos diagnósticos |  | |  | |  | |  | | |
| III Selección de GPC |  | |  | |  | |  | | |
| IV Datos de los registros |  | |  | |  | |  | | |
| V Cuestionario anual |  | |  | |  | |  | | |
| **¿Incorporarías, modificarías o suprimirías alguna?** | | | | | | | | | |
| **d) En el desarrollo de la experiencia de colaboración probablemente hayan intervenido factores como los que se señalan a continuación. ¿Cómo valorarías su importancia para el futuro de la colaboración AP/SM?** | | | | | | | | | |
| Interés y dedicación de los profesionales de los centros |  | |  | |  | |  | | |
| Existencia de un responsable/coordinador en cada centro |  | |  | |  | |  | | |
| Seguimiento de la experiencia y coordinación entre los diferentes centros |  | |  | |  | |  | | |
| Apoyo por parte de la gestión |  | |  | |  | |  | | |
| **¿Incorporarías, modificarías o suprimirías alguno?** | | | | | | | | | |

Muchas gracias por tu colaboración

El equipo
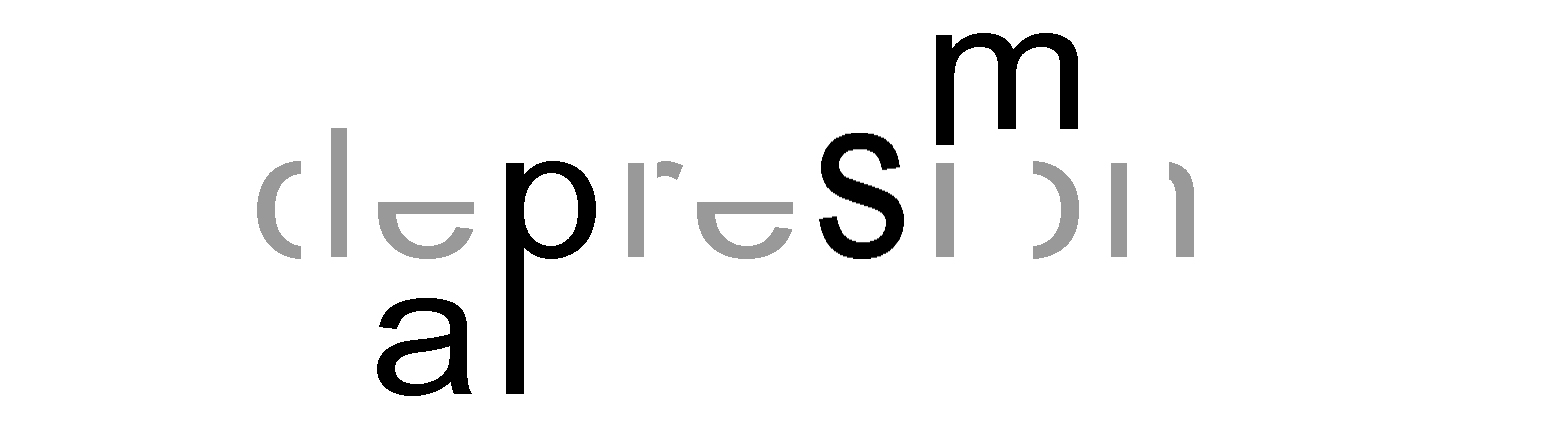


1. Si por tu profesión no derivas o no recibes informes deja esta pregunta en blanco. [↑](#footnote-ref-2)
